# Supplementary material
Source: publisher figshare collection journal article supplement (https://frontiersin.figshare.com/ndownloader/files/31117210)
Supplement: Supplementary file [file 31117210]

## Supplementary material

### *Arabidopsis thaliana* PRR7 provides circadian input to the CCA1 promoter in shoots but not roots

Hugh G. Nimmo\*, Janet Laird

Institute of Molecular, Cell and Systems Biology, University of Glasgow, Glasgow G12 8QQ, UK

\*Corresponding author, email [hugh.nimmo@glasgow.ac.uk](mailto:hugh.nimmo@glasgow.ac.uk)

**Figure S1** *prp7-11* shoots are arrhythmic in DD

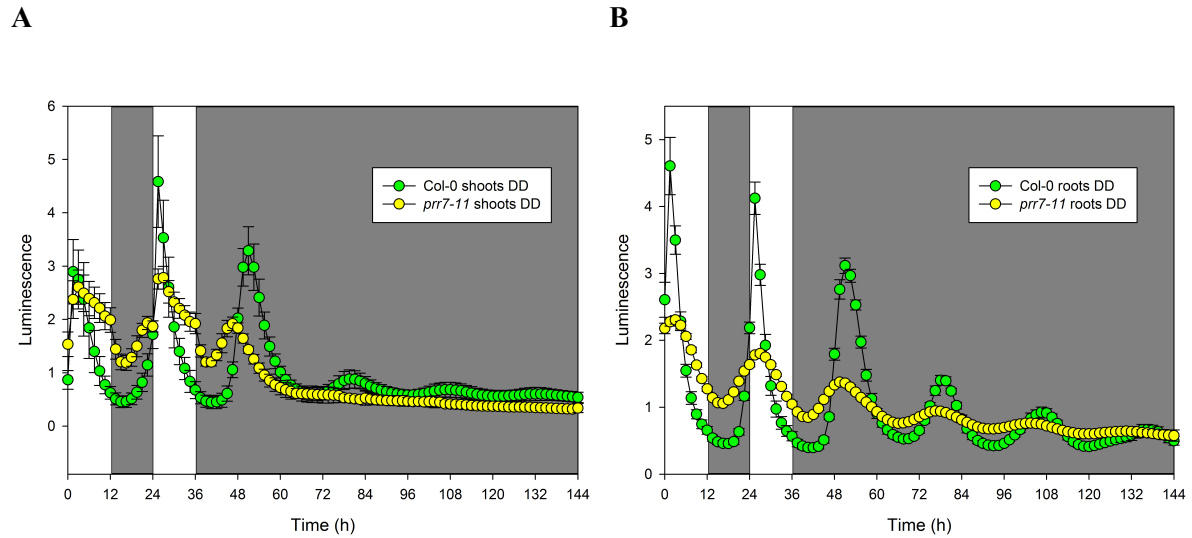

The data show mean  $\pm$  SD luminescence for Col-0 and *prp7-11* shoots (A) and roots (B) expressing CCA1::LUC (n = 14 replicates) in two LD cycles followed by DD.

**Figure S2** Period and robustness of rhythms in Col-0 and *prp7-3*

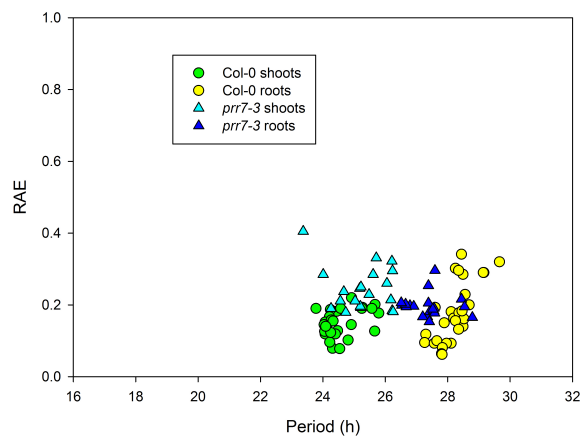

Period and RAE data for Col-0 (circles) and *prp7-3* (triangles) are from individual traces in the experiment shown in Fig. 4.

**Figure S3 Effects of *prp7* mutation on phase**

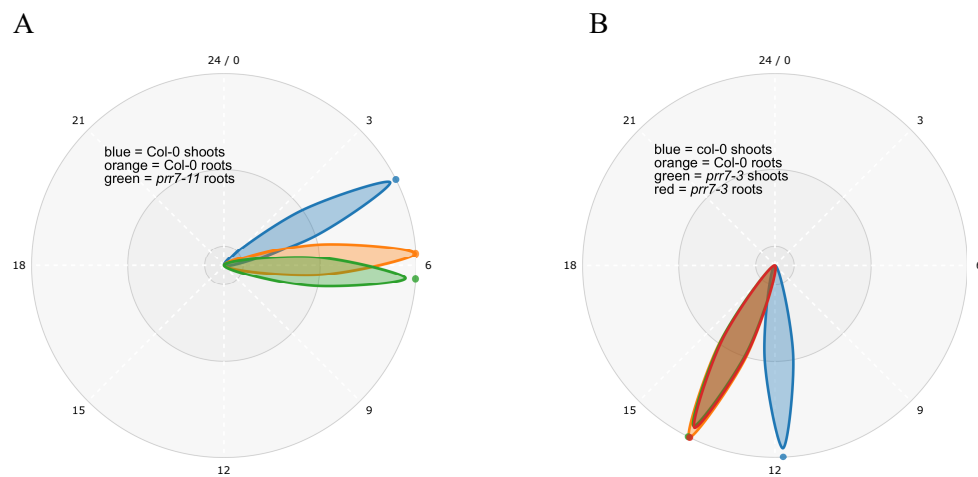

Average circadian phases were calculated relative to subjective dawn using the individual time courses in the experiments shown in Fig. 1A,B and Fig. 4A,B, see <https://biodare2.ed.ac.uk/documents/phases>.

**Table S1 Effect of light intensity on period in Col-0 and *prp7-11***

| Sample               | Period $\pm$ SD (h)                       | Period $\pm$ SD (h)                      | P value |
|----------------------|-------------------------------------------|------------------------------------------|---------|
|                      | Intensity 50 $\mu\text{mol/m}^2/\text{s}$ | Intensity 5 $\mu\text{mol/m}^2/\text{s}$ |         |
| Col-0 shoots         | 24.40 $\pm$ 0.30                          | 27.94 $\pm$ 0.41                         | <0.0001 |
| Col-0 roots          | 28.21 $\pm$ 0.84                          | 30.08 $\pm$ 0.54                         | <0.0001 |
| <i>prp7-11</i> roots | 25.47 $\pm$ 1.45                          | 29.24 $\pm$ 0.90                         | <0.0001 |

The P values are for 50 vs 5  $\mu\text{mol/m}^2/\text{s}$  by Student's t test with n = 16 replicates in all cases. *prp7-11* shoots are not included because of their lack of robustness.

## DATA AVAILABILITY

The data that support the findings of this study are available at [biodare2.ed.ac.uk](https://biodare2.ed.ac.uk), experiment numbers 19235, 19437 and 19781.
